# Supplementary material for: Enhancing the catalytic efficiency and stability of photoenzymes using hydrogen-bonded organic framework material HOF-101
Source: Royal Society of Chemistry journal article supplement (doi:10.1039/d3tc00504f), 2023-01-01
Supplement: d3tc00504f1.pdf [file d3tc00504f1.pdf]

1 **Supporting Information**

2 **Enhancing the Catalytic Efficiency and Stability of Photoenzymes**

3 **Using Hydrogen-bonded Organic Framework Material HOF-101**

4 Guohua Li<sup>a,b</sup>, Xifeng Lv<sup>b</sup>, Wei Ji<sup>b</sup>, Yegui Zhou<sup>b</sup>, Zhiwen Lin

5 Hui Cao<sup>b,#</sup>, Tianwei Tan<sup>a,b,#</sup>

6 a Beijing Advanced Innovation Center for Soft Matter Science and  
7 Engineering, Beijing University of Chemical Technology, Beijing,  
8 100029 China.

9 b National Energy R&D Center for Biorefinery, Beijing Key  
10 Laboratory of Bioprocess, Beijing University of Chemical Technology.  
11 Beijing, 15th, Beisanhuan East Road, Beijing, 100029, PR China.

12 # Corresponding authors: Tianwei Tan (twtan@mail.buct.edu.cn), Hui  
13 Cao(caohui@mail.buct.edu.cn). 15th, Beisanhuan East Road, Beijing, PR  
14 China.

15 Principal author: Guohua Li (16622881217@163.com), ORCID: 0000-  
16 0002-7829-9941

17 **Supporting table**

18 **Table S1 B Solution type and configuration method**

| Type of Solution B | TCPP | M   | LDH |
|--------------------|------|-----|-----|
| HOF-101            | 0    | 0   | 0   |
| <u>T@HOF-101</u>   | 0.2  | 0   | 0   |
| <u>TM@HOF-101</u>  | 0.2  | 0.2 | 0   |
| <u>TML@HOF-101</u> | 0.2  | 0.2 | 0.2 |

19 Solution B was prepared by dissolving in 18ML methanol according  
20 to the formula in Table S1. The units of values in this table are mg/mL.

21 **Table S2 The photocatalytic regeneration performance of NADH by**  
 22 **different photocatalysts.**

| Photocatalyst                                  | Concentration of photocatalyst (g L <sup>-1</sup> ) | Mediator          | Reaction equilibrium time (min) | Yield (%) | TOF (h <sup>-1</sup> ) |
|------------------------------------------------|-----------------------------------------------------|-------------------|---------------------------------|-----------|------------------------|
| TM@HOF-101<br>(our study)                      | 1                                                   | Rh <sup>[a]</sup> | 40                              | 74.5      | 6.36                   |
| PCN@TA/PEI-Rh <sup>4</sup>                     | 0.5                                                 | Rh                | 20                              | 37.8      | 70.82                  |
| SiPP@CPNL-Rh <sup>5</sup>                      | 1                                                   | Rh                | 28                              | 39.6      | 44.8                   |
| GCN@M/TiO <sub>2</sub> <sup>6</sup>            | 2.5                                                 | Rh                | 20                              | 58        | 42.67                  |
| Co1/C <sub>3</sub> N <sub>4</sub> <sup>7</sup> | 2                                                   | Rh                | 10                              | 98        | 33.01                  |
| Rh-NU-1006 <sup>8</sup>                        | 1                                                   | Rh                | 120                             | 28        | 20.69                  |
| DBTS-CMP <sub>1</sub> <sup>9</sup>             | 1                                                   | Rh                | 45                              | 84        | 3.75                   |
| ACN <sup>10</sup>                              | 2                                                   | Rh                | 60                              | 62.3      | 3.36                   |
| ATCN-DSCN <sup>1</sup>                         | 0.7                                                 | Rh                | 15                              | 74        | 2.95                   |
| TCPP/SiO <sub>2</sub> /Rh HNPs <sup>11</sup>   | 2                                                   | Rh                | 180                             | 75        | 1.67                   |
| CTF <sup>12</sup>                              | -                                                   | Rh                | 120                             | 75.9      | 0.76                   |
| AM/M/BP HNSs <sup>13</sup>                     | 0.2                                                 | Rh                | 180                             | 89        | 0.5                    |

23 <sup>[a]</sup> Rh is [Cp\*Rh(bpy)H<sub>2</sub>O]<sup>2+</sup>.



## 25 References

- 26 1. J. Meng, Y. Tian, C. Li, X. Lin, Z. Wang, L. Sun, Y. Zhou, J. Li, N. Yang, Y. Zong, F. Li, Y. Cao and  
27 H. Song, *Catalysis Science & Technology*, 2019, **9**, 1911-1921.
- 28 2. Z. Tang, X. Li, L. Tong, H. Yang, J. Wu, X. Zhang, T. Song, S. Huang, F. Zhu, G. Chen and G.  
29 Ouyang, *Angew Chem Int Ed Engl*, 2021, **60**, 23608-23613.
- 30 3. Y. Tan, J. Ma, F. Zhang, S. Wang, F. Lan, H. Liu and R. Li, *ACS Sustainable Chemistry &*  
31 *Engineering*, 2022, **10**, 12065-12071.
- 32 4. Y. Cheng, J. Shi, Y. Wu, X. Wang, Y. Sun, Z. Cai, Y. Chen and Z. Jiang, *Research (Wash D C)*,  
33 2021, **2021**, 8175709.
- 34 5. S. Li, Y. Cheng, Y. Chen, J. Li, Y. Sun, J. Shi and Z. Jiang, *Applied Catalysis B: Environmental*,  
35 2022, **317**.
- 36 6. S. Zhang, Y. Zhang, Y. Chen, D. Yang, S. Li, Y. Wu, Y. Sun, Y. Cheng, J. Shi and Z. Jiang, *ACS*  
37 *Catalysis*, 2020, **11**, 476-483.
- 38 7. W. Liu, W. Hu, L. Yang and J. Liu, *Nano Energy*, 2020, **73**.
- 39 8. Y. Chen, P. Li, J. Zhou, C. T. Buru, L. Dordevic, P. Li, X. Zhang, M. M. Cetin, J. F. Stoddart, S. I.  
40 Stupp, M. R. Wasielewski and O. K. Farha, *J Am Chem Soc*, 2020, **142**, 1768-1773.
- 41 9. F. Lan, Q. Wang, H. Chen, Y. Chen, Y. Zhang, B. Huang, H. Liu, J. Liu and R. Li, *ACS Catalysis*,  
42 2020, **10**, 12976-12986.
- 43 10. E. J. Son, Y. W. Lee, J. W. Ko and C. B. Park, *ACS Sustainable Chemistry & Engineering*, 2018, **7**,  
44 2545-2552.
- 45 11. X. Ji, J. Wang, L. Mei, W. Tao, A. Barrett, Z. Su, S. Wang, G. Ma, J. Shi and S. Zhang, *Advanced*  
46 *Functional Materials*, 2018, **28**.
- 47 12. R. K. Yadav, A. Kumar, N.-J. Park, K.-J. Kong and J.-O. Baeg, *Journal of Materials Chemistry A*,  
48 2016, **4**, 9413-9418.
- 49 13. X. Ji, Y. Kang, T. Fan, Q. Xiong, S. Zhang, W. Tao and H. Zhang, *Journal of Materials Chemistry*  
50 *A*, 2020, **8**, 323-333.

51
